# Supplementary material for: Thermo- and ion-responsive silk-elastin-like proteins and their multiscale mechanisms
Source: Royal Society of Chemistry journal article supplement (doi:10.1039/d2tb01002j), 2022-01-01
Supplement: d2tb01002j1.pdf [file d2tb01002j1.pdf]

# 1 Thermo- and Ion-responsive Silk-elastin-like Proteins and Their Multiscale

## 2 Mechanisms

3 Haoyuan Shi<sup>1</sup>, Ting Ji<sup>2</sup>, Chenxi Zhai<sup>1</sup>, Junting Lu<sup>2</sup>, Wenwen Huang<sup>2,3,4\*</sup>, Jingjie Yeo<sup>1\*</sup>

4 <sup>1</sup>J<sup>2</sup> Lab for Engineering Living Materials, Sibley School of Mechanical and Aerospace  
5 Engineering, Cornell University, Ithaca, NY, 14853, United States.

6 <sup>2</sup>The Zhejiang University–University of Edinburgh Institute, Zhejiang University School of  
7 Medicine, Zhejiang University, Hangzhou 310058, China.

8 <sup>3</sup>Department of Orthopedics of the Second Affiliated Hospital, Zhejiang University School of  
9 Medicine, Zhejiang University, Hangzhou 310058, China.

10 <sup>4</sup>Dr. Li Dak Sum & Yip Yio Chin Center for Stem Cells and Regenerative Medicine, Zhejiang  
11 University School of Medicine, Zhejiang University, Hangzhou, China.

12

13 \*Corresponding authors: [wenwenhuang@intl.zju.edu.cn](mailto:wenwenhuang@intl.zju.edu.cn), [jingjieyeo@cornell.edu](mailto:jingjieyeo@cornell.edu).

## 14 CHARMM Potential Function and Generalized Born Implicit Solvent (GBIS)

15 The CHARMM potential function<sup>1</sup> in the fully atomistic molecular simulation is given by:

$$\begin{aligned} 16 \quad U_{CHARMM} = & \sum_{bonds} K_b (b_{ij} - b_0)^2 + \sum_{angles} K_\theta (\theta_{ijk} - \theta_0)^2 + \sum_{dihedrals} K_\varphi [1 + \cos(n\varphi_{ijkl} - \delta)]^2 \\ 17 \quad & + \sum_{improper} K_\phi (\phi_{ijkl} - \phi_0)^2 + \sum_{Urey-Bradley} K_{UB} (U_{ik} - U_0)^2 \\ 18 \quad & + \sum_{nonbonded} \left\{ \varepsilon_{ij} \left[ \left( \frac{\sigma_{ij}}{r_{ij}} \right)^{12} - 2 \left( \frac{\sigma_{ij}}{r_{ij}} \right)^6 \right] + \frac{q_i q_j}{4\pi D r_{ij}} \right\} \end{aligned}$$

19 where  $K_b$ ,  $K_\theta$ ,  $K_\varphi$ ,  $K_\phi$ , and  $K_{UB}$  are the bond, angle, dihedral angle, improper angle and Urey–  
20 Bradley force constants, respectively;  $b_{ij}$ ,  $\theta_{ijk}$ ,  $\varphi_{ijkl}$ ,  $\phi_{ijkl}$ , and  $U_{ik}$  are the bond length, bond  
21 angle, dihedral angle, improper torsion angle, and Urey–Bradley 1,3-distance respectively;  $b_0$ ,  
22  $\theta_0$ ,  $\varphi_0$ ,  $\phi_0$ , and  $U_0$  are the equilibrium terms for such variables;  $n$  is the periodicity and  $\delta$  the  
23 phase of a torsion;  $\varepsilon_{ij}$  is the well depth of the Lennard-Jones potential;  $\sigma_{ij}$  is the distance at the  
24 LJ minimum;  $q$  is the partial atomic charge;  $D$  is the effective dielectric constant; and  $r_{ij}$  is the  
25 distance between any atoms  $i$  and  $j$ .

26 Generalized Born implicit solvent (GBIS)<sup>2</sup> is used to significantly decrease the computational  
27 costs with the approximate method for calculating molecular electrostatics in solvent as  
28 described by the Poisson Boltzmann equation (PBE) that models water as a dielectric  
29 continuum.<sup>3</sup> The Generalized Born equation is an approximation of the PBE, and the total  
30 solvation free energy is given by:<sup>4</sup>

$$31 \quad \Delta G_{solv}^{GB} = \sum_i \Delta G_{ii}^{GB} + \sum_i \sum_{i>j} \Delta G_{ij}^{GB}$$

32 Where  $\Delta G_{ii}^{GB}$  is the Born radius dependent self-energy of atom  $i$ , and  $\Delta G_{ij}^{GB}$  is the GB energy  
33 between atoms  $i$  and  $j$ .

34

## 35 **Temperature Intervals with Global Exchange of Replicas (TIGER2)**

### 36 *TIGER2 in implicit solvent*

37 Compared to traditional REMD, the TIGER2 method<sup>5</sup> significantly improves computing  
38 efficiency due to global exchange of replicas, thereby obtaining the global-minimum  
39 conformation more efficiently. The sampling cycle is decomposed into (I) heating, (II) sampling,  
40 and (III) quenching phases (Fig. S3a). Next, replicas will be compared, selected, and reassigned  
41 to higher temperature levels according to their potential energies; i.e., a higher potential energy  
42 state is assigned to a higher temperature level. The swap decisions are based on the probability:

$$43 \quad P = \min \left[ 1, \exp \left( \frac{E_A - E_B}{k_b \cdot T_{base}} \right) \right]$$

44 As all the replicas start and end under the baseline temperature, we can freely choose the number  
45 of replicas without considering the acceptance ratio, and the distribution of temperatures across  
46 the replicas exponentially increase from the lowest to the highest according to the function:

$$47 \quad T_i = T_{min} \left( \frac{T_{max}}{T_{min}} \right)^{\frac{i-1}{n-1}}$$

48 where  $n$  is the number of replicas.

49

### 50 *TIGER2 hybrid solvent with water shell (TIGER2hs)*

51 Structural refinements in explicit solvent and ionic environments will be carried out using the  
52 TIGER2hs method. Compared to the implicit TIGER2 method, in TIGER2hs, simulating in the  
53 explicit solvent can predict protein conformations more precisely, and exchanging replicas based  
54 on potential energies in the implicit solvent with a layer of explicitly modeled water shell (Fig.  
55 S3b) avoid statistical noise generated by fully explicit solvent<sup>6</sup> while still accounting for more  
56 accurate solvation effects<sup>7</sup> than a purely implicit solvent. The number of water molecules in a  
57 shell is based on the proteins' degrees of freedom, such that  $N_{shell} = \frac{1}{3} \cdot \frac{3N_{protein}-3}{6}$  where protein  
58 has  $3N_{protein} - 3$  degrees of freedom and the water molecule in solution has 6 external degrees  
59 of freedom.

60

### 61 **Martini 3.0 Coarse-grain Potential**

62 Martini coarse-grained scheme uses an approximate 4:1 CG-AA mapping by combining top-  
63 down and bottom-up strategies.<sup>8</sup> Among them, Martini 3.0 (version 3.0.b.3.2)<sup>9</sup> is the newest  
64 version of Martini's coarse-grain potential, which updates the parameters and improves the  
65 accuracy. The potential energy function in the Martini system is described as:

$$66 \quad U_{Martini} = U_{bonds} + U_{angles} + U_{dihedrals} + U_{constraints} + U_{LJ} + U_{Coulombic}$$

67 Where  $U_{bonds}$ ,  $U_{angles}$ , and  $U_{dihedrals}$  are harmonic bond, angle, and dihedral potentials,  
68  $U_{constraints}$  is the constraints in rigid rings and secondary structures,  $U_{LJ}$ , and  $U_{Coulombic}$  are  
69 Lennard-Jones potentials and Coulombic potentials.

70

### 71 **Relative Accessible Surface Area (RASA)**

72 RASA of a protein residue is used to measure the residue solvent exposure. In this work, we  
73 calculated RASA for dityrosine crosslink sites in tyrosine, which is the ortho and meta carbons in  
74 the phenol group. The formula is:<sup>10</sup>

$$75 \quad RASA = \frac{SASA}{MaxSASA}$$

76 Where SASA is the solvent-accessible surface area, and MaxSASA is the maximum possible  
77 solvent-accessible surface area for the site. The MaxSASA was obtained from Gly-Tyr-Gly

78 tripeptides with backbone angles of  $\phi = -120^\circ$  and  $\psi = 140^\circ$ , same as Miller's work.<sup>11</sup> The  
79 MaxSASA of tyrosine is 228.769 Å<sup>2</sup> based on VMD<sup>12</sup> TCL scripts, which is comparable to the  
80 229.0 Å<sup>2</sup> in Miller's work.<sup>11</sup> Then, we calculate the MaxSASA for four dityrosine crosslink sites  
81 in tyrosine, as shown in Table 1. Here, we defined an exposed site that is more than 20 % RASA  
82 of the average MaxSASA.<sup>13</sup> The SASA and the number of exposed dityrosine crosslink sites of  
83 representative SELP and Azo-SELP structures were shown in Table S2 and Table S3,  
84 respectively. However, in Table 1, we calculated the average values based on the most populated  
85 cluster obtained by the TIGER2 REMD sampling methods. Here, we did not show the site with a  
86 0 value of SASA.

87

88

89

90

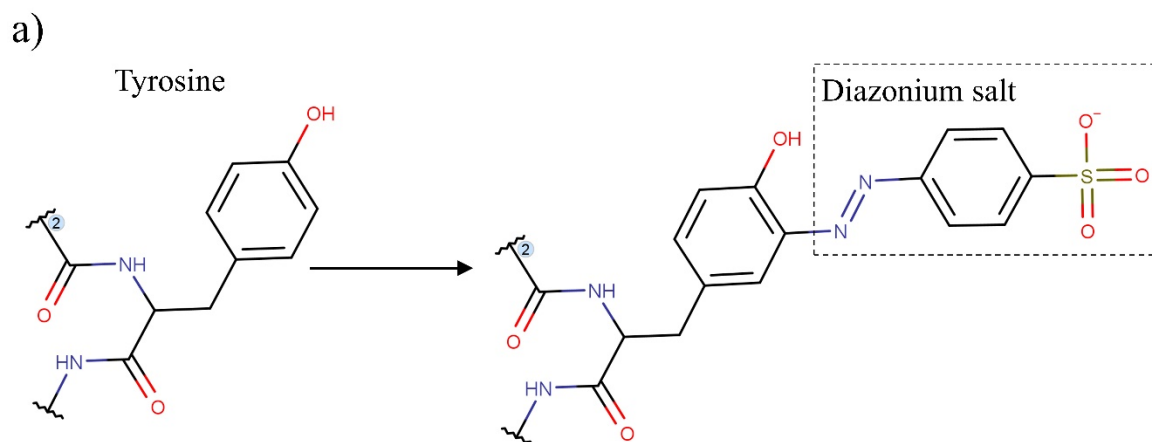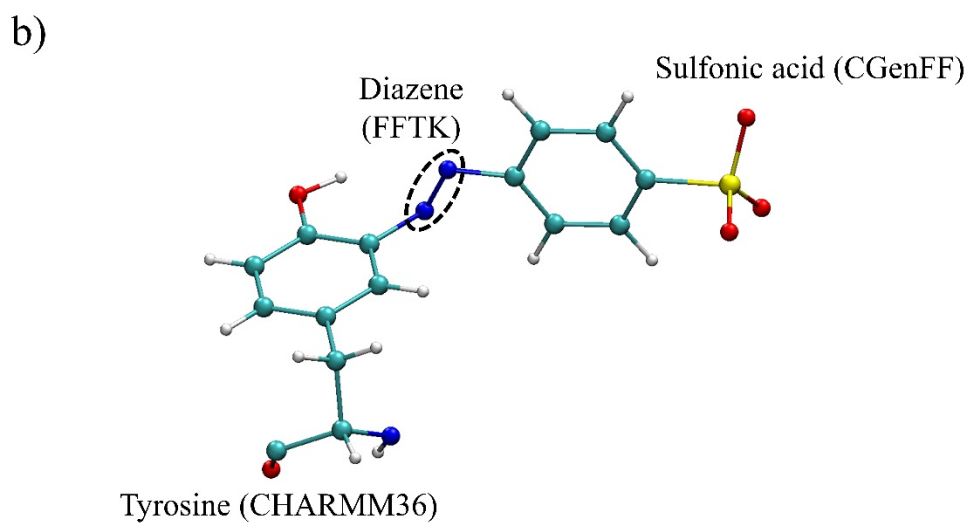

91

92 Fig. S1. a) Aryl diazonium salt with sulfonic acid used to modify tyrosine in SELP. b) The  
 93 forcefield used in modified-tyrosine.

94

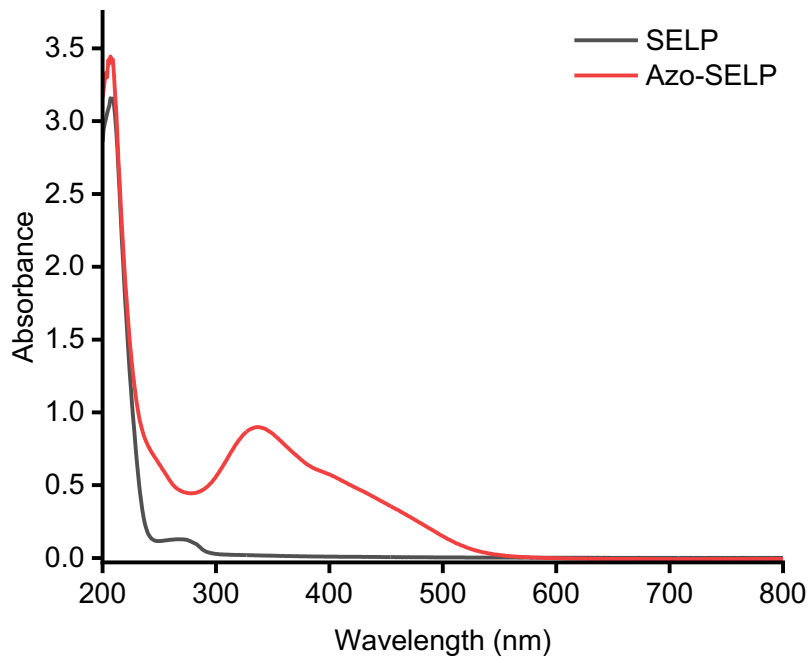

95

96 Fig. S2. UV-Vis spectra of SELP (black) and Azo-SELP (red), showing the diazonium  
97 modification in Azo-SELP.

98

99

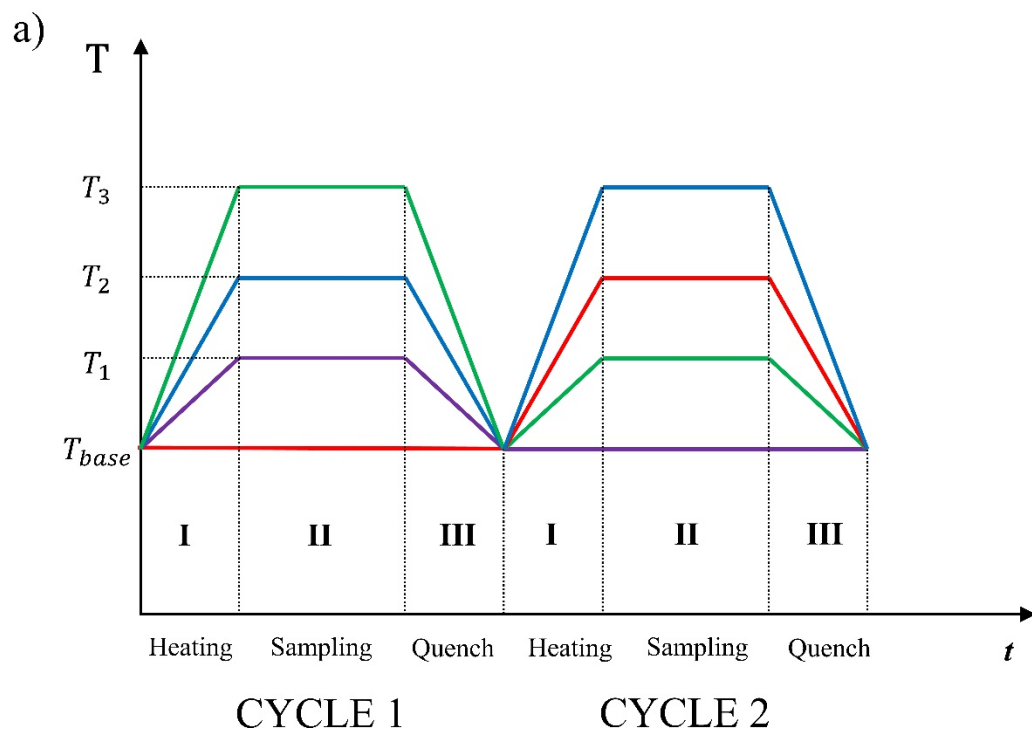

b)

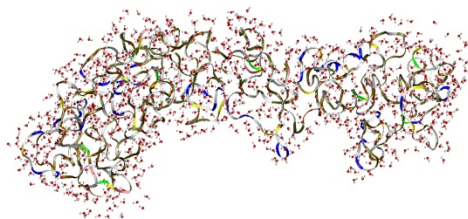

100

101 Fig. S3. a) The scheme of the TIGER2 method, each sampling cycle contains (I) heating, (II)  
 102 sampling, and (III) quenching phases. b) SELPs with water shell.

103

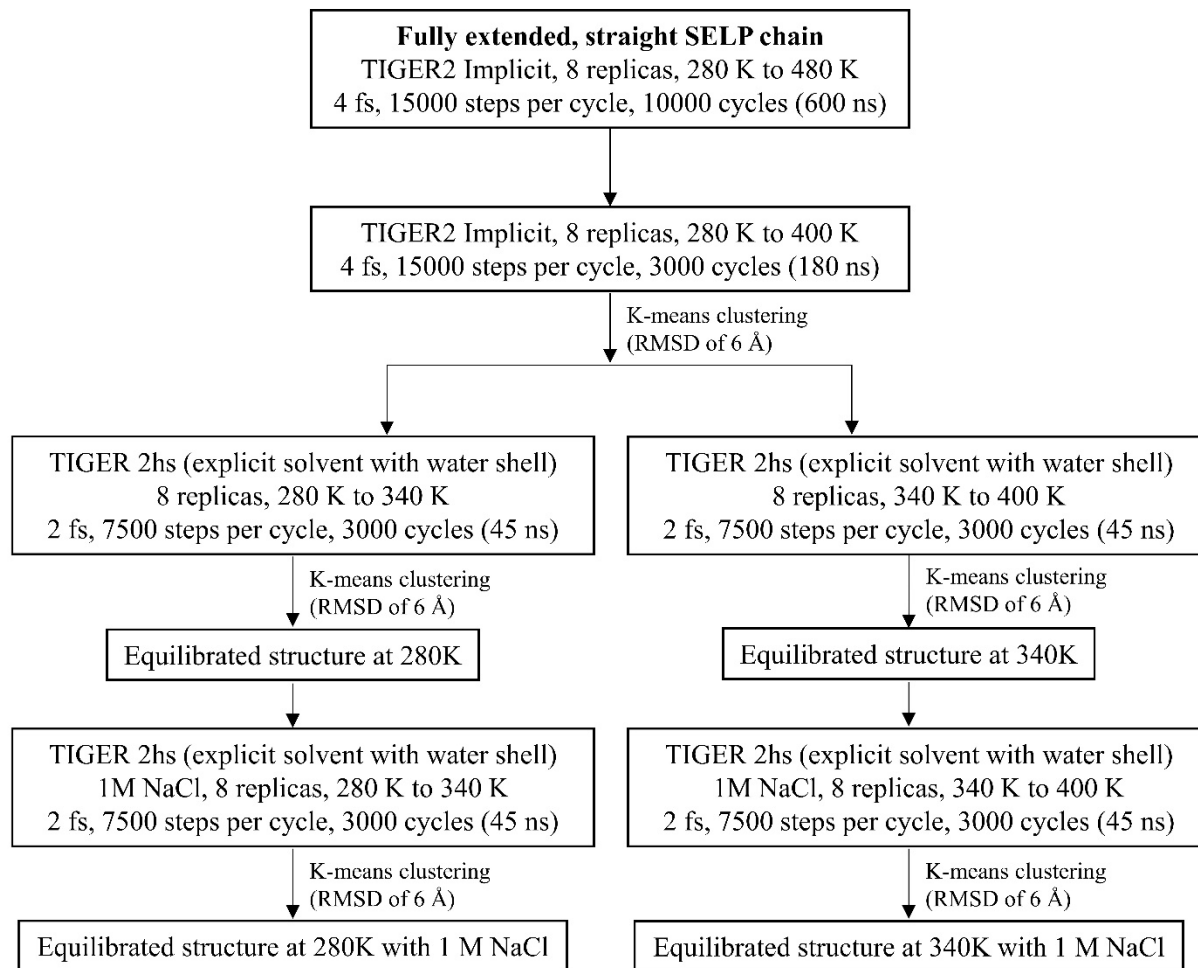

104

105 Fig. S4. The scheme of the FAMD simulations with the TIGER2 method for folding SELP at  
 106 280 K and 340 K.

107



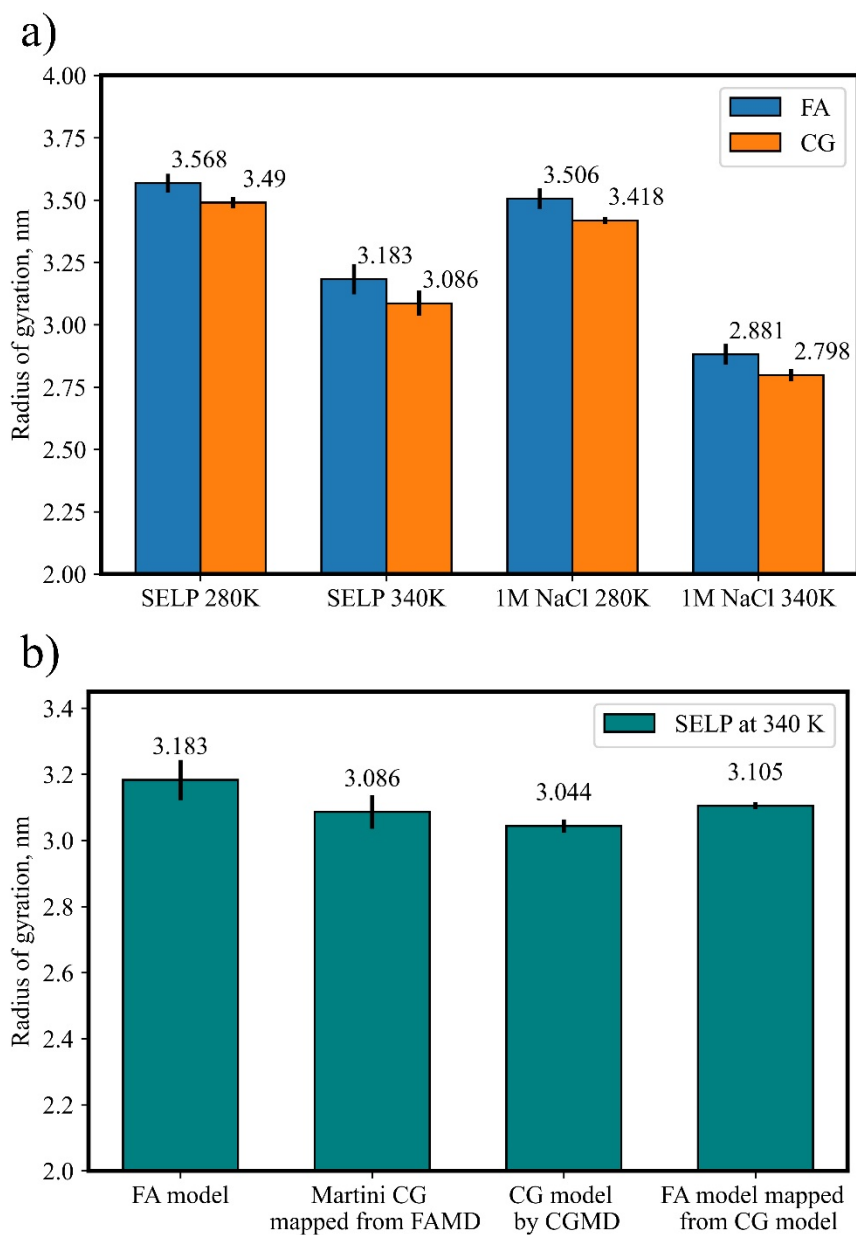

108

109 Fig. S5. a) Martini CG mapping from the representative FA SELP model. The CG model is  
 110 consistent with the FA model regarding the radius of gyration after 20 ns CGMD simulations. b)  
 111 Four SELP models at 340 K, including FA model, CG model mapped from FA model after 20 ns  
 112 CG simulation, 500 ns CGMD simulation K as in the Method section from CG SELP model at  
 113 280, and FA model mapped from CG model obtained in CGMD simulation. The radius of  
 114 gyration is consistent for all four models, signifying the reasonability for using CGMD to obtain  
 115 the structure at different temperatures.

116

117 Table S1 The MaxSASA and SASA (RASA = 20 %) for four dityrosine crosslink sites of Tyr in  
118 Gly-Tyr-Gly.

| Carbon name | MaxSASA/ Å <sup>2</sup> | SASA (RASA = 20 %)/ Å <sup>2</sup> |
|-------------|-------------------------|------------------------------------|
| CD1         | 27.292                  | 5.458                              |
| CD2         | 15.458                  | 3.092                              |
| CE1         | 26.085                  | 5.217                              |
| CE2         | 32.364                  | 6.473                              |
| Average     | 25.300                  | 5.060                              |

119

120 Table S2 The SASA and the number of exposed dityrosine crosslink sites of the representative  
121 SELP structure.

| Carbon name | Atom Id | SASA/ Å <sup>2</sup> | Exposed site (> 5.06 Å <sup>2</sup> ) |
|-------------|---------|----------------------|---------------------------------------|
| CD1         | 282     | 0.63409913           | 0                                     |
| CD2         | 289     | 0.42273274           | 0                                     |
| CD1         | 895     | 8.03192234           | 1                                     |
| CE1         | 897     | 5.91825819           | 1                                     |
| CD2         | 902     | 6.76372385           | 1                                     |
| CE2         | 904     | 6.12962484           | 1                                     |
| CE1         | 1510    | 3.38186193           | 0                                     |
| CD1         | 2734    | 4.22732735           | 0                                     |
| CE1         | 2736    | 7.18645668           | 1                                     |
| CD2         | 2741    | 8.877388             | 1                                     |
| CE2         | 2743    | 5.91825819           | 1                                     |
| CD1         | 3347    | 3.80459476           | 0                                     |
| CE1         | 3349    | 9.0887537            | 1                                     |
| CD2         | 3354    | 4.86142635           | 0                                     |
| CE2         | 3356    | 9.93421936           | 1                                     |
| CD1         | 3960    | 2.32503009           | 0                                     |
| CE1         | 3962    | 5.28415918           | 1                                     |
| CD2         | 3967    | 6.34099102           | 1                                     |
| CE2         | 3969    | 10.145586            | 1                                     |
| CD1         | 4573    | 1.69093096           | 0                                     |
| CD1         | 5186    | 4.65006018           | 0                                     |
| CE1         | 5188    | 9.30012035           | 1                                     |
| CD2         | 5193    | 3.80459476           | 0                                     |
| CE2         | 5195    | 8.24328804           | 1                                     |
| CD1         | 5799    | 2.9591291            | 0                                     |
| CE1         | 5801    | 5.28415918           | 1                                     |
| CD2         | 5806    | 0.21136637           | 0                                     |
| CE2         | 5808    | 0.42273274           | 0                                     |
| Total       |         | 145.842795           | 15                                    |

122

123

124 Table S2 The SASA and the number of exposed dityrosine crosslink sites of representative Azo-  
125 SELP structure.

| Carbon name | Atom Id | SASA/ Å <sup>2</sup> | Exposed site (> 5.06 Å <sup>2</sup> ) |
|-------------|---------|----------------------|---------------------------------------|
| CE1         | 284     | 0.21136637           | 0                                     |
| CD1         | 910     | 0.84546548           | 0                                     |
| CE1         | 912     | 7.18645668           | 1                                     |
| CD1         | 1538    | 11.8365164           | 1                                     |
| CE1         | 1540    | 12.047883            | 1                                     |
| CD2         | 1542    | 5.70689201           | 1                                     |
| CD1         | 2166    | 11.413784            | 1                                     |
| CE1         | 2168    | 9.51148701           | 1                                     |
| CD2         | 2170    | 0.21136637           | 0                                     |
| CD1         | 2794    | 7.60918951           | 1                                     |
| CE1         | 2796    | 4.22732735           | 0                                     |
| CD2         | 2798    | 4.01596117           | 0                                     |
| CD1         | 3422    | 8.877388             | 1                                     |
| CE1         | 3424    | 11.8365164           | 1                                     |
| CD1         | 4050    | 5.28415918           | 1                                     |
| CE1         | 4052    | 8.45465469           | 1                                     |
| CD1         | 4678    | 0.21136637           | 0                                     |
| CD2         | 5938    | 4.65006018           | 0                                     |
| Total       |         | 114.13784            | 11                                    |

126

- 127 1 B. R. Brooks, R. E. Bruccoleri, B. D. Olafson, D. J. States, S. Swaminathan and M.  
128 Karplus, *Journal of Computational Chemistry*, 1983, **4**, 187–217.
- 129 2 W. C. Still, A. Tempczyk, R. C. Hawley and T. Hendrickson, *Journal of the American*  
130 *Chemical Society*, 1990, **112**, 6127–6129.
- 131 3 A. V Onufriev and D. A. Case, *Annual review of biophysics*, 2019, **48**, 275–296.
- 132 4 J. C. Phillips, D. J. Hardy, J. D. C. Maia, J. E. Stone, J. V Ribeiro, R. C. Bernardi, R.  
133 Buch, G. Fiorin, J. Hénin, W. Jiang, R. McGreevy, M. C. R. Melo, B. K. Radak, R. D. Skeel, A.  
134 Singharoy, Y. Wang, B. Roux, A. Aksimentiev, Z. Luthey-Schulten, L. V Kalé, K. Schulten, C.  
135 Chipot and E. Tajkhorshid, *The Journal of chemical physics*, 2020, **153**, 44130.
- 136 5 X. Li, R. A. Latour and S. J. Stuart, *Journal of Chemical Physics*, 2009, **130**, 1–9.
- 137 6 X. Li, J. A. Snyder, S. J. Stuart and R. A. Latour, *The Journal of chemical physics*, 2015,  
138 **143**, 144105.
- 139 7 N. Geist, M. Kulke, L. Schulig, A. Link and W. Langel, *Journal of Physical Chemistry B*,  
140 2019, **123**, 5995–6006.
- 141 8 S. J. Marrink, H. J. Risselada, S. Yefimov, D. P. Tieleman and A. H. de Vries, *Journal of*  
142 *Physical Chemistry B*, 2007, **111**, 7812–7824.
- 143 9 P. C. T. Souza, R. Alessandri, J. Barnoud, S. Thallmair, I. Faustino, F. Grünewald, I.  
144 Patmanidis, H. Abdizadeh, B. M. H. Bruininks, T. A. Wassenaar, P. C. Kroon, J. Melcer, V.  
145 Nieto, V. Corradi, H. M. Khan, J. Domański, M. Javanainen, H. Martinez-Seara, N. Reuter, R. B.  
146 Best, I. Vattulainen, L. Monticelli, X. Periole, D. P. Tieleman, A. H. de Vries and S. J. Marrink,  
147 *Nature Methods*, 2021, **18**, 382–388.
- 148 10 M. Z. Tien, A. G. Meyer, D. K. Sydykova, S. J. Spielman and C. O. Wilke, *PloS one*,  
149 2013, **8**, e80635–e80635.
- 150 11 S. Miller, J. Janin, A. M. Lesk and C. Chothia, *Journal of Molecular Biology*, 1987, **196**,  
151 641–656.
- 152 12 W. Humphrey, A. Dalke and K. Schulten, *Journal of Molecular Graphics*, 1996, **14**, 33–  
153 38.
- 154 13 C. Savojardo, M. Manfredi, P. L. Martelli and R. Casadio, *Frontiers in Molecular*  
155 *Biosciences*, 2021, **7**, 460.

156
